# Supplementary material
Source: publisher figshare collection journal article supplement (https://acs.figshare.com/ndownloader/files/14206043)
Supplement: Supplementary file 1 [file 14206043]

# Appendix for Thermodynamic Modeling of the Equilibrium Partitioning of Hydrocarbons in Nanoporous Kerogen Particles

Jinlu Liu and Walter G. Chapman\*

*Department of Chemical and Biomolecular Engineering, Rice University, 6100 Main St,  
Houston, TX, 77005, USA*

E-mail: wgchapman@rice.edu

## Appendix A: Free energy functionals

The ideal gas and chain formation contributions are the same as in interfacial Statistical Associating Fluid Theory (iSAFT), with the equations already presented in our previous work.<sup>1</sup> For the hard sphere contribution, we apply the White-Bear version of fundamental measure theory<sup>2</sup> to be consistent in the bulk with the hard sphere part in the PC-SAFT EoS. The temperature dependent hard sphere diameter of component  $i$  is,

$$d_i = \sigma_i \left[ 1 - 0.12 \exp \left( -3 \frac{\varepsilon_i}{k_b T} \right) \right] \quad (1)$$

The major challenge lies in approximating the long range attraction between molecules at the interface. In a non-local density functional theory (NLDFT), Weighted Density Approximation (WDA) is a method that approximates the free energy density at each location by the same macroscopic thermodynamic relation at a smoothed density. This smoothed

density can be evaluated in various ways in different recipes depending on the fluid intermolecular potentials and the purpose of modeling.<sup>3</sup> The method by Sauer and Gross<sup>4</sup> and similarly by Yu<sup>5</sup> has been proved to be practically valuable for real fluid modeling, both at the vapor-liquid interface and fluid-solid interface. Considering the computational efficiency and practical interest of interfacial properties (i.e. interfacial tension and adsorption isotherms), we apply this approach to have the inhomogeneous fluid free energy reduce to PC-SAFT EoS in this study.

$$\Delta A^{\text{disp}}[\rho_s(\mathbf{r}); \rho(\mathbf{r})] = k_b T \int \bar{\rho}(\mathbf{r}_1) a^{\text{disp}}(\bar{\rho}(\mathbf{r}_1)) d\mathbf{r}_1 \quad (2)$$

where  $\bar{\rho}(\mathbf{r}_1)$  is the total weighted density of both fluid and solid ( $N + 1$  components) at position  $\mathbf{r}_1$ ,

$$\bar{\rho}(\mathbf{r}_1) = \sum_{i=1}^{N+1} \bar{\rho}_i(\mathbf{r}_1) \quad (3)$$

$$\bar{\rho}(\mathbf{r}_1) = \sum_{i=1}^N \left[ \frac{3}{4\pi(\varphi d_i)^3} \int \rho_i(\mathbf{r}_2) \Theta(\varphi d_i - |\mathbf{r}_1 - \mathbf{r}_2|) d\mathbf{r}_2 \right] + \frac{3}{4\pi(\varphi d_s)^3} \int \rho_s(\mathbf{r}_2) \Theta(\varphi d_s - |\mathbf{r}_1 - \mathbf{r}_2|) d\mathbf{r}_2 \quad (4)$$

$\Theta$  is the Heaviside function,  $d_i$  and  $d_s$  are the temperature dependent diameters of the  $i^{\text{th}}$  solvent and kerogen, and  $\varphi$  is an adjustable parameter that sets the volume range over which density is averaged. In this work,  $\varphi = 1.21$  from our previous work<sup>6,7</sup> was used.

$a^{\text{disp}}(\bar{\rho}(\mathbf{r}_1))$  is the bulk dispersion free energy per molecule evaluated at weighted density  $\bar{\rho}(\mathbf{r}_1)$ ,

$$a^{\text{disp}}(\bar{\rho}(\mathbf{r}_1)) = -2\pi\bar{\rho}(\mathbf{r}_1) I_1(\bar{\eta}(\mathbf{r}_1), \bar{m}(\mathbf{r}_1)) \overline{m^2 \varepsilon \sigma^3}(\mathbf{r}_1) - \pi\bar{\rho}(\mathbf{r}_1) \bar{m}(\mathbf{r}_1) C_1 I_2(\bar{\eta}(\mathbf{r}_1), \bar{m}(\mathbf{r}_1)) \overline{m^2 \varepsilon^2 \sigma^3}(\mathbf{r}_1) \quad (5)$$

where van der Waals one-fluid mixing rule is used as shown below.

$$\overline{m^2 \varepsilon^\alpha \sigma^3}(\mathbf{r}_1) = \sum_{i=1}^{N+1} \sum_{j=1}^{N+1} \left( \frac{\bar{\rho}_i(\mathbf{r}_1)}{\bar{\rho}(\mathbf{r}_1)} \right) \left( \frac{\bar{\rho}_j(\mathbf{r}_1)}{\bar{\rho}(\mathbf{r}_1)} \right) m_i m_j \left( \frac{\varepsilon_{ij}}{k_b T} \right)^\alpha \sigma_{ij}^3; \quad \alpha = 1 \text{ or } 2 \quad (6)$$

The integrals over bulk correlation functions  $I_1$  and  $I_2$  and compressibility term are given by the following equations.

$$\bar{\eta} = \frac{\pi}{6} \sum_{i=1}^{N+1} \bar{\rho}_i(\mathbf{r}_1) m_i d_i^3 \quad (7)$$

$$C_1 = \left[ 1 + \frac{8\bar{\eta} - 2\bar{\eta}^2}{(1 - \bar{\eta})^4} \right]^{-1} \quad (8)$$

$$I_1 = \sum_{i=0}^6 a_i \bar{\eta}^i \quad (9)$$

$$I_2 = \sum_{i=0}^6 b_i \bar{\eta}^i \quad (10)$$

where values of  $a_i$  and  $b_i$  are the universal constants in PC-SAFT EoS.

## Appendix B: Solve for the equilibrium fluid density distribution

Once the equilibrium bulk composition in kerogen/solvent phase and solvent phase are decided, a step function is used as the initial guess of the fluid density profile,

$$\rho_i^0(z) = \begin{cases} \rho_i^{\text{kerogen,b}} & -\frac{H_s}{2} \leq z < 0 \\ \rho_i^{\text{bulk}} & 0 \leq z \leq \frac{H_{\text{pore}}}{2} \end{cases} \quad \text{for } i = 1, 2, \dots, N \quad (11)$$

Considering the symmetry of the kerogen-pore composite, a reflective boundary condition is applied at both  $z = -H_s/2$  and  $z = -H_{\text{pore}}/2$ . The calculation domain is discretized into  $dz = 0.01\sigma_{ref}$ , with  $\sigma_{ref}$  being one of the segment diameters of the mixture. Numerical integration in  $z$  direction is done by Simpson's rule. The calculation starts from eq 11 and Picard iteration is applied to eq 14 in the article until the sum of the absolute difference in all density points between the last two solutions is smaller than the tolerance of 3.0E-5.

## References

- (1) Liu, J.; Wang, L.; Xi, S.; Asthagiri, D.; Chapman, W. G. Adsorption and Phase Behavior of Pure/Mixed Alkanes in Nanoslit Graphite Pores: An iSAFT Application. Langmuir **2017**, 33, 11189–11202.
- (2) Roth, R.; Evans, R.; Lang, a.; Kahl, G. Fundamental measure theory for hard-sphere mixtures revisited: the White Bear version. J. Phys. Condens. Matter **2002**, 14, 12063–12078.
- (3) Müller, M.; MacDowell, L.; Yethiraj, A. Short chains at surfaces and interfaces: a quantitative comparison between density-functional theories and Monte Carlo simulations. J. Chem. Phys. **2003**, 118, 2929–2940.
- (4) Sauer, E.; Gross, J. Classical density functional theory for liquid–fluid interfaces and confined systems: A functional for the perturbed-chain polar statistical associating fluid theory equation of state. Ind. Eng. Chem. Res. **2017**, 56, 4119–4135.
- (5) Yu, Y.-X. A novel weighted density functional theory for adsorption, fluid-solid interfacial tension, and disjoining properties of simple liquid films on planar solid surfaces. J. Chem. Phys. **2009**, 131, 024704.
- (6) Heier, M.; Stephan, S.; Liu, J.; Chapman, W. G.; Hasse, H.; Langenbach, K. Equation of state for the Lennard-Jones truncated and shifted fluid with a cut-off radius of  $2.5 \sigma$  based on perturbation theory and its applications to interfacial thermodynamics. Molecular Physics **2018**, 1–12.
- (7) Stephan, S.; Liu, J.; Langenbach, K.; Chapman, W. G.; Hasse, H. Vapor-Liquid Interface of the Lennard-Jones Truncated and Shifted Fluid: Comparison of Molecular Simulations, Density Gradient theory, and Denstiy Functional Theory. The Journal of Physical Chemistry C
